# Supplementary material for: Naïve-like conversion enhances the difference in innate in vitro differentiation capacity between rabbit ES cells and iPS cells
Source: PubMed Central journal article supplement — J Reprod Dev. 2014 Oct 25;61(1):13–9. doi: 10.1262/jrd.2014-098 (PMC4354226; doi:10.1262/jrd.2014-098), 2014-10-25
Supplement: jrd-61-013-s001.pdf [file jrd-61-013-s001.pdf]

Supplementary Table 1. PCR primers.

| Gene name     | Forward (5' to 3')      | Reverse (5' to 3')    |
|---------------|-------------------------|-----------------------|
| <i>OCT3/4</i> | CCTTCGCAGGGGGGCCTA      | CATGGGGGAGCCCAGAGCA   |
| <i>KLF4</i>   | ACAACCCGGCCCTCCTAGCC    | GAAGCTGACGCCGAGGTGGT  |
| <i>KLF5</i>   | TCAGTTTCTGCCACAACAGG    | GGATTGTGAATTGCCAGCTT  |
| <i>SOX2</i>   | AGCATGATGCAGGAGCAG      | GGAGTGGGGAGGAAGAGGT   |
| <i>NANOG</i>  | GGCTGGAGAGTTCTTGCATC    | GTGAAAACCTCCCGACTCTGC |
| <i>cMYC</i>   | GACGCGTCCTTCTCCCCCA     | CTCTGGTTACCATGTCACCG  |
| <i>G3PDH</i>  | GGAGCCAAACGGGTCATCATCTC | GAGGGGCCATCCACGTCTTCT |
