# Supplementary material for: Naïve-like conversion enhances the difference in innate in vitro differentiation capacity between rabbit ES cells and iPS cells
Source: PubMed Central journal article supplement — J Reprod Dev. 2014 Oct 25;61(1):13–9. doi: 10.1262/jrd.2014-098 (PMC4354226; doi:10.1262/jrd.2014-098), 2014-10-25

1 **Supplementary figure legends**

2 Supplementary Figure 1. Characterization of naïve-like rdES4 (left panels) and rdES6  
3 (right panels) cells. The colony morphology is shown for primed-state rdESCs (top  
4 panels), naïve-like converted ESCs (upper middle panels), expressing  
5 hOCT3/4-IRES-GFP (lower middle panel) and alkaline phosphatase activity (bottom  
6 panels). Scale bar = 200  $\mu\text{m}$ .

7 Supplementary Figure 2. Immunohistochemical detection of oligodendrocytes using an  
8 anti-O1 antibody (A) (red) and anti-O1 and anti-CNPase signals merged (B) (orange;  
9 arrowheads) before (top panels) and after (bottom panels) naïve-like conversion of rdES4  
10 (left panels) and rdES6 (right panels) cells. Mature oligodendrocytes with dendrites  
11 (arrows) were derived from naïve-like rdES cells. Scale bar = 100  $\mu\text{m}$ .

12 Supplementary Table 1. Primers used in this study.

13

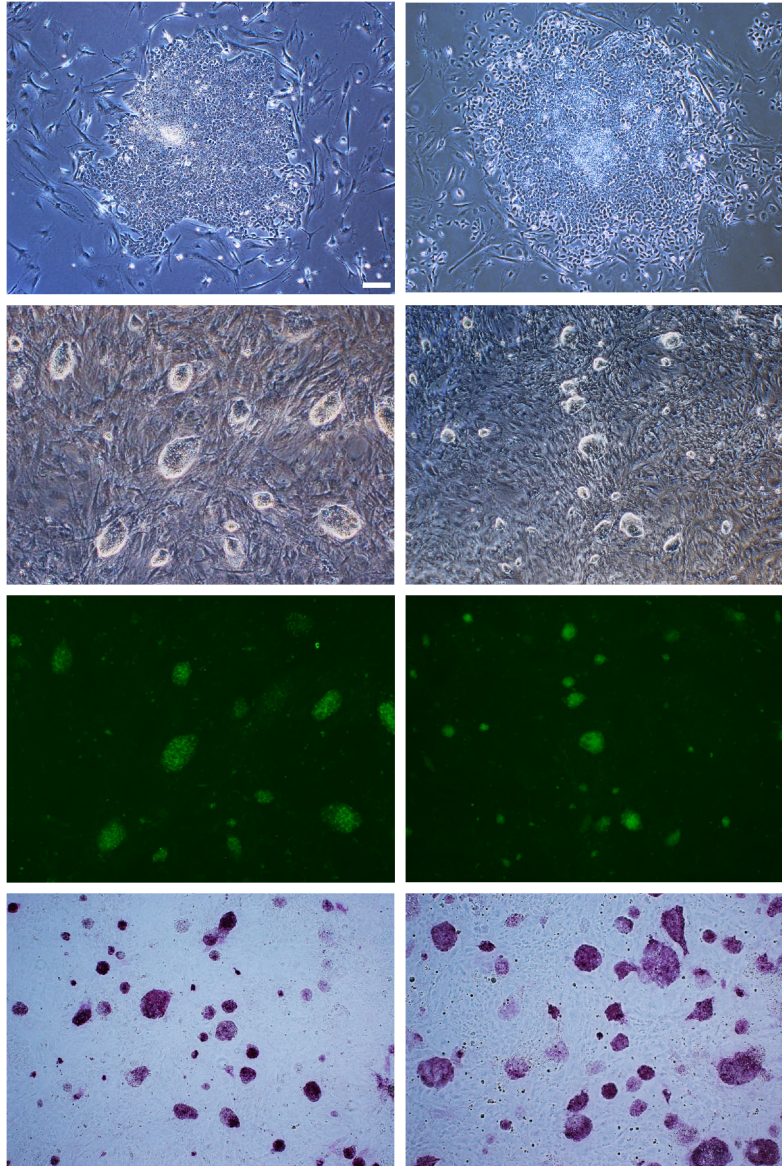

Supplemental Fig. 1. Honsho *et. al.*

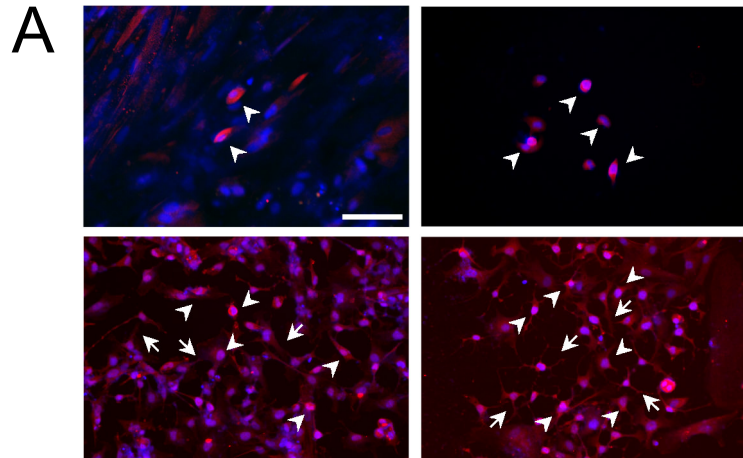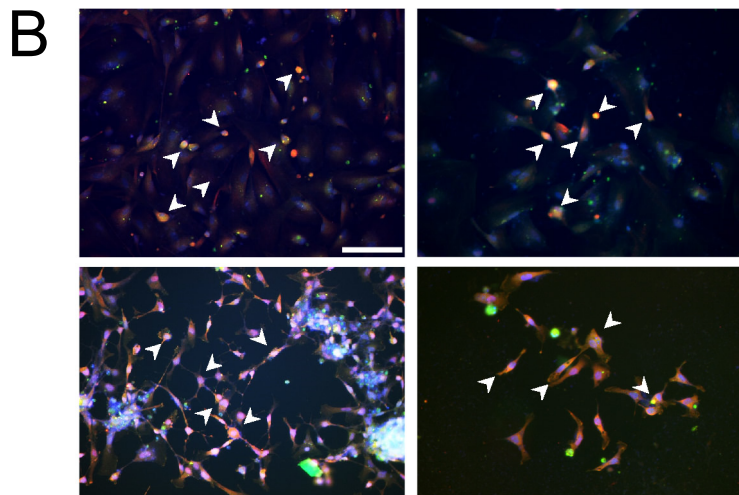

Supplement: jrd-61-013-s002.pdf [file jrd-61-013-s002.pdf]
